# Supplementary material
Source: publisher figshare collection journal article supplement (https://tandf.figshare.com/articles/dataset/_/4769374)
Supplement: Supplementary file 1 [file 1]

**Table S1.** Different gut bacteria between the rats fed with two kinds of diet.

| Significantly changed gut bacteria                                               | Mean OTU of rice-diet group | Mean OTU of pork-diet group | P value from t-test | LEfSe analysis |
|----------------------------------------------------------------------------------|-----------------------------|-----------------------------|---------------------|----------------|
| Bacteroidetes Bacteroidia Bacteroidales Porphyromonadaceae Barnesiella           | 0.0089 ± 0.0074             | 0.0317 ± 0.0101             | 0.001               | Biomarker      |
| Firmicutes Erysipelotrichi Erysipelotrichales Erysipelotrichaceae Bulleidia      | 0.0019 ± 0.0024             | 0.0075 ± 0.0029             | 0.005               | Biomarker      |
| Bacteroidetes Bacteroidia Bacteroidales Prevotellaceae Prevotella                | 0.0051 ± 0.0046             | 0.0329 ± 0.0191             | 0.006               | Biomarker      |
| Firmicutes Clostridia Clostridiales Peptococcaceae Desulfitibacter               | 0.0032 ± 0.0012             | 0.0012 ± 0.0008             | 0.007               |                |
| Proteobacteria Betaproteobacteria Burkholderiales Alcaligenaceae Parasuttrella   | 0                           | 0.0019 ± 0.0014             | 0.007               | Biomarker      |
| Firmicutes Clostridia Clostridiales Eubacteriaceae Alkalibacter                  | 0.0095 ± 0.0056             | 0.0017 ± 0.0022             | 0.009               |                |
| Firmicutes Clostridia Clostridiales Incertae Anaerovorax                         | 0.0084 ± 0.0047             | 0.0222 ± 0.0097             | 0.011               |                |
| Firmicutes Clostridia Clostridiales Lachnospiraceae Oribacterium                 | 0.0003 ± 0.0005             | 0.0029 ± 0.0019             | 0.011               | Biomarker      |
| Bacteroidetes Bacteroidia Bacteroidales Bacteroidaceae Bacteroides               | 0.0026 ± 0.0029             | 0.0408 ± 0.0308             | 0.013               | Biomarker      |
| Firmicutes Clostridia Clostridiales Ruminococcaceae Oscillibacter                | 0.0029 ± 0.0025             | 0.0082 ± 0.0035             | 0.013               |                |
| Proteobacteria Gammaproteobacteria Enterobacteriales Enterobacteriaceae Yersinia | 0.0018 ± 0.0015             | 0.0001 ± 0.0002             | 0.019               |                |
| Firmicutes Bacilli Lactobacillales Aerococcaceae Dolosicoccus                    | 0.0008 ± 0.0004             | 0.0001 ± 0.0003             | 0.022               | Biomarker      |
| Actinobacteria Actinobacteria Coriobacteriales Coriobacteriaceae Paraeggerthella | 0.0102 ± 0.0077             | 0.0013 ± 0.0022             | 0.022               |                |
| Bacteroidetes Sphingobacteria Sphingobacteriales Sphingobacteriaceae Nubella     | 0.0002 ± 0.0003             | 0.0025 ± 0.002              | 0.022               |                |
| Proteobacteria Gammaproteobacteria Enterobacteriales Enterobacteriaceae Serratia | 0.0021 ± 0.0016             | 0.0003 ± 0.0005             | 0.025               |                |
| Bacteroidetes Bacteroidia Bacteroidales Porphyromonadaceae Tannerella            | 0.0018 ± 0.0028             | 0.0067 ± 0.0038             | 0.029               | Biomarker      |
| Bacteroidetes Bacteroidia Bacteroidales Rikenellaceae Alistipes                  | 0.0006 ± 0.0012             | 0.0042 ± 0.0033             | 0.031               |                |
| Firmicutes Clostridia Clostridiales Lachnospiraceae Robinsoniella                | 0.0575 ± 0.0236             | 0.1049 ± 0.0431             | 0.040               |                |
| Bacteroidetes Flavobacteria Flavobacteriales Flavobacteriaceae Flavobacterium    | 0.0005 ± 0.0005             | 0.0001 ± 0.0002             | 0.042               |                |
| Firmicutes Clostridia Clostridiales Eubacteriaceae Anaerofustis                  | 0.0023 ± 0.0023             | 0.0002 ± 0.0005             | 0.046               | Biomarker      |
| Firmicutes Clostridia Clostridiales Ruminococcaceae Anaerotruncus                | 0.0076 ± 0.0044             | 0.0037 ± 0.0017             | 0.073               | Biomarker      |
| Bacteria Firmicutes Clostridia Clostridiales Lachnospiraceae Dorea               | 0.0709 ± 0.0407             | 0.0364 ± 0.0188             | 0.089               | Biomarker      |
| Bacteria Firmicutes Clostridia Clostridiales Lachnospiraceae Johnsonella         | 0.0023 ± 0.0016             | 0.0139 ± 0.0157             | 0.101               | Biomarker      |
