# Supplementary material
Source: publisher figshare collection journal article supplement (https://tandf.figshare.com/articles/dataset/_/4769374)

**Figure S1.** Anatomic pathology of the rats a. fed with rice-based diets; b. fed with pork-based diets.

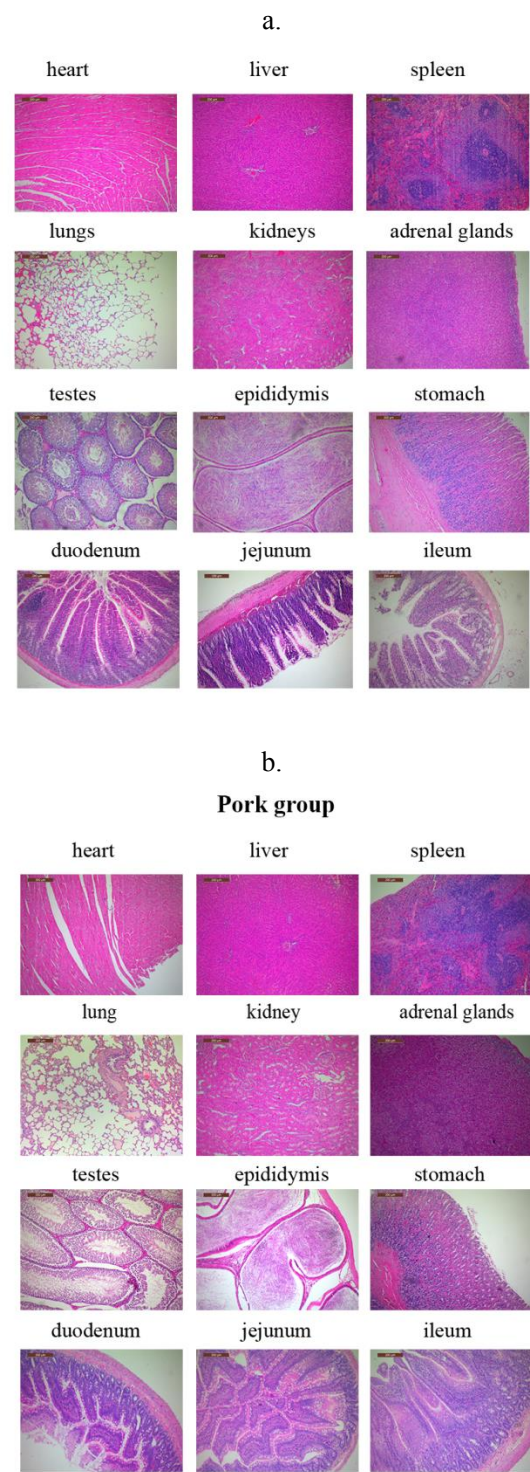

Supplement: Supplementary file 2 [file 1]
